# Supplementary material for: Are dependencies of extreme rainfall on humidity more reliable in convection-permitting climate models?
Source: Copernicus journal article supplement (doi:10.5194/hess-29-1201-2025), 2025-03-03
Supplement: Supplementary file 1 [file hess-29-1201-2025-supplement.pdf]

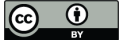

*Supplement of*

## **Are dependencies of extreme rainfall on humidity more reliable in convection-permitting climate models?**

**Geert Lenderink et al.**

*Correspondence to:* Geert Lenderink ([geert.lenderink@knmi.nl](mailto:geert.lenderink@knmi.nl))

The copyright of individual parts of the supplement might differ from the article licence.

## Model simulations

Table S1. List of RCM model simulations. All RCM simulations have been performed with 12 km grid spacing

| Short name | Long name                    | Time stamp in files | Institute                                                                    | Tas | Humidity  |
|------------|------------------------------|---------------------|------------------------------------------------------------------------------|-----|-----------|
| COSMO-CLM  | CLMcom-ETH-COSMO-crCLIM-v1-1 | 2019-09-02          | ETH Zurich, Zurich, Switzerland in collaboration with the CLM-Community      | 3hr | hurs, 3hr |
| HadRM3     | MOHC-HadREM3-GA7-05          | 2020-01-31          | MetOffice, Hadley Centre, UK                                                 | 3hr | hurs, 3hr |
| RACMO      | KNMI-RACMO22E (v1)           | 2017-05-09          | Royal Netherlands Meteorological Institute, De Bilt, The Netherlands         | 3hr | hurs, 3hr |
| RCA4       | SMHI-RCA4 (v1)               | 2018-12-27          | Swedish Meteorological and Hydrological Institute, Rosby Centre, Sweden      | 3hr | hurs, 3hr |
| HIRHAM5    | DMI-HIRHAM5 (v1)             | 2014-02-19          | Danish Meteorological Institute, Danmark                                     | 3hr | hurs, 3hr |
| REMO       | REMO2015_v2                  | NA                  | GERICS, Germany                                                              | 3hr | tdps, 3hr |
| ALADIN     | CNRM-ALADIN63 (v1)           | 2018-09-29          | CNRM (Centre National de Recherches Meteorologiques, Toulouse 31057, France) | 3hr | hurs, 3hr |

Table S2. List of CPM simulations. Domain "ALP" stands for the Alpine domain as used in the CORDEX FPS study (Ban et al. 2021). Only runs have been considered where the domain also covers The Netherlands. Domain "NWE" stands for the European North Western domain as defined within the European EUCP project.

| Short name | Long name              | period    | Institute                                                               | Domain | Humidity  |
|------------|------------------------|-----------|-------------------------------------------------------------------------|--------|-----------|
| COSMO-CLM  | COSMO-pompa_5.0_2019.1 | 2000-2009 | ETH Zurich, Zurich, Switzerland in collaboration with the CLM-Community | ALP    | Huss, 3hr |
| UKMO-UM    | UKMO-UM10p1_v01        | 2000-2011 | MetOffice, Hadley Centre, UK                                            | ALP    | hurs, 3hr |
| HCLIM-ALP  | HCLIM38h1_KNMI         | 1999-2009 | Royal Netherlands Meteorological Institute, De Bilt, The Netherlands    | ALP    | hurs, 3hr |
| HCLIM-NWE  | HCLIM38h1_KNMI         | 2008-2018 |                                                                         | NWE    | hurs      |
| AROME41    | CNRM-AROME41t1         | 2000-2009 | CNRM                                                                    | NWE    |           |

# Supplementary Information Figures

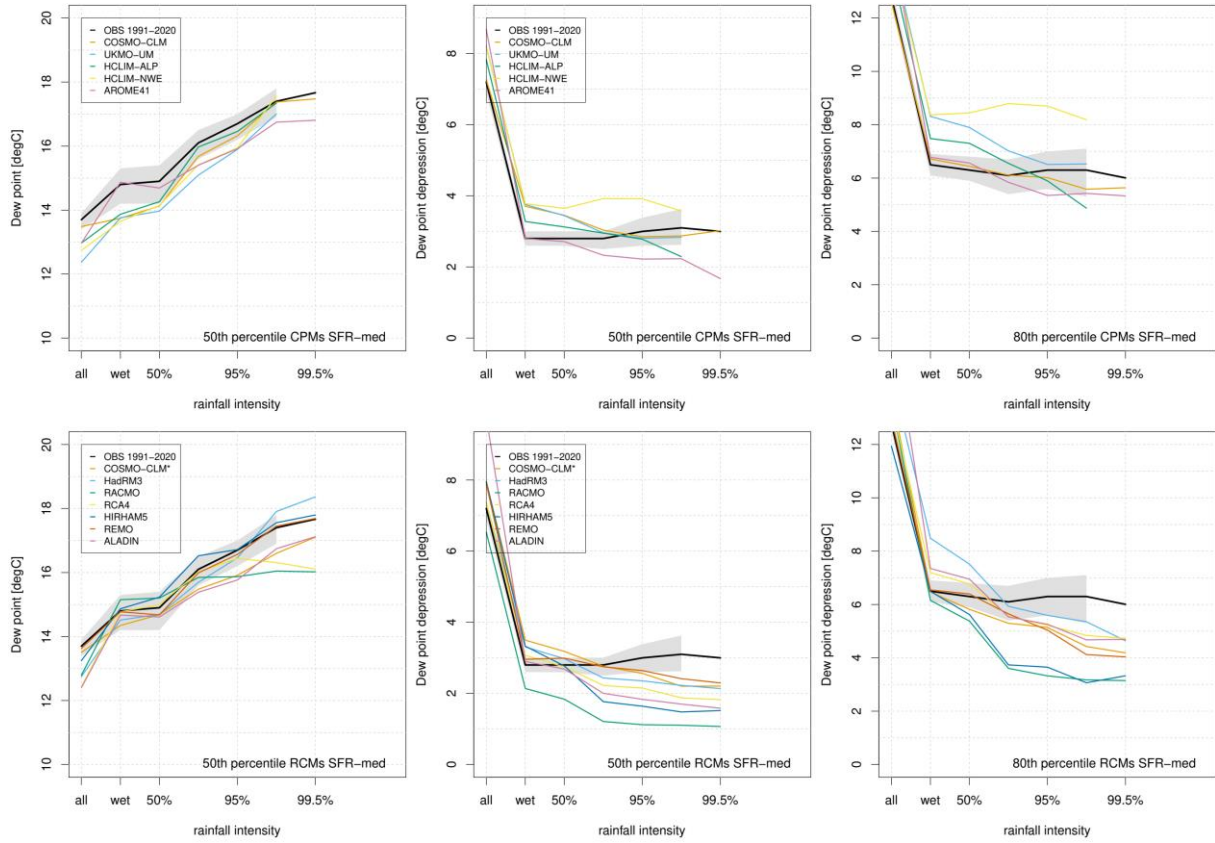

Figure S1. As Figure 3 from main paper, but now for SFR-med.

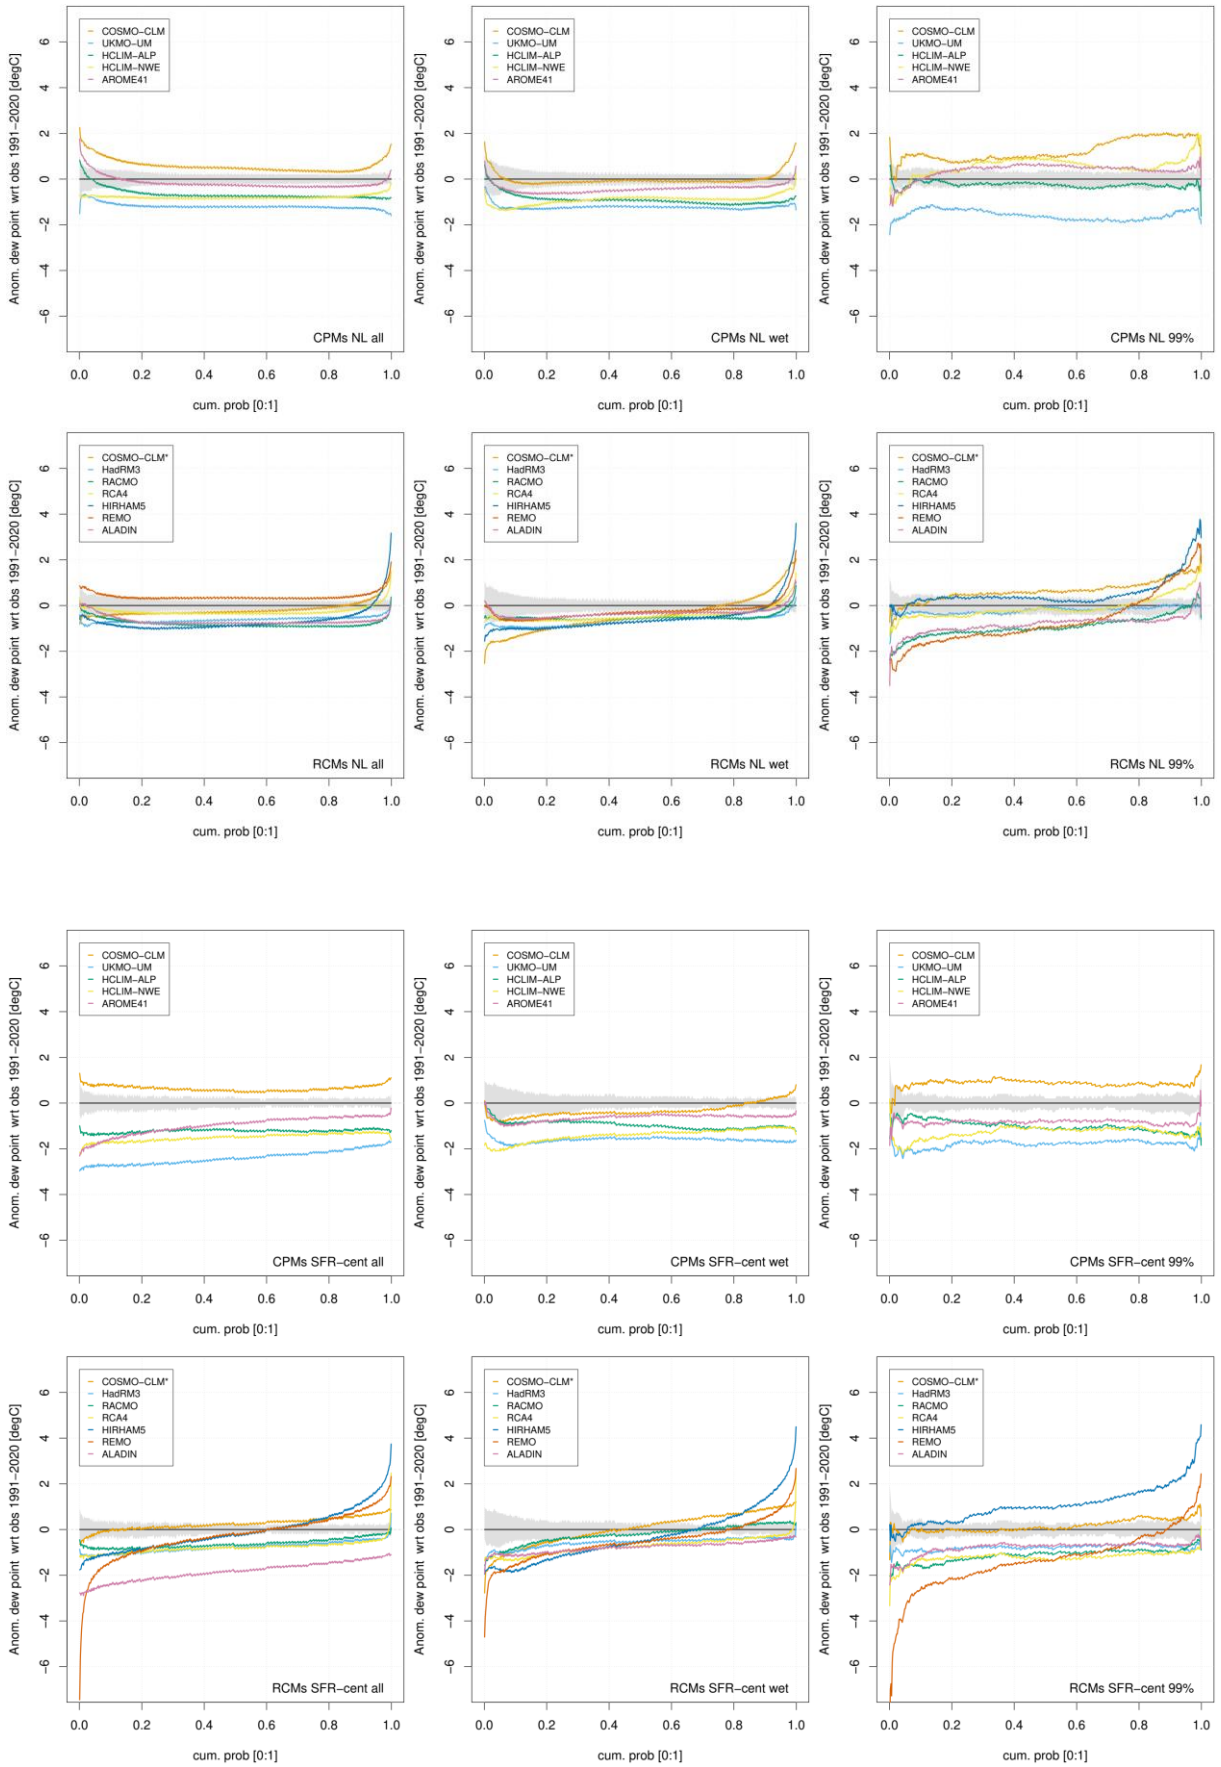

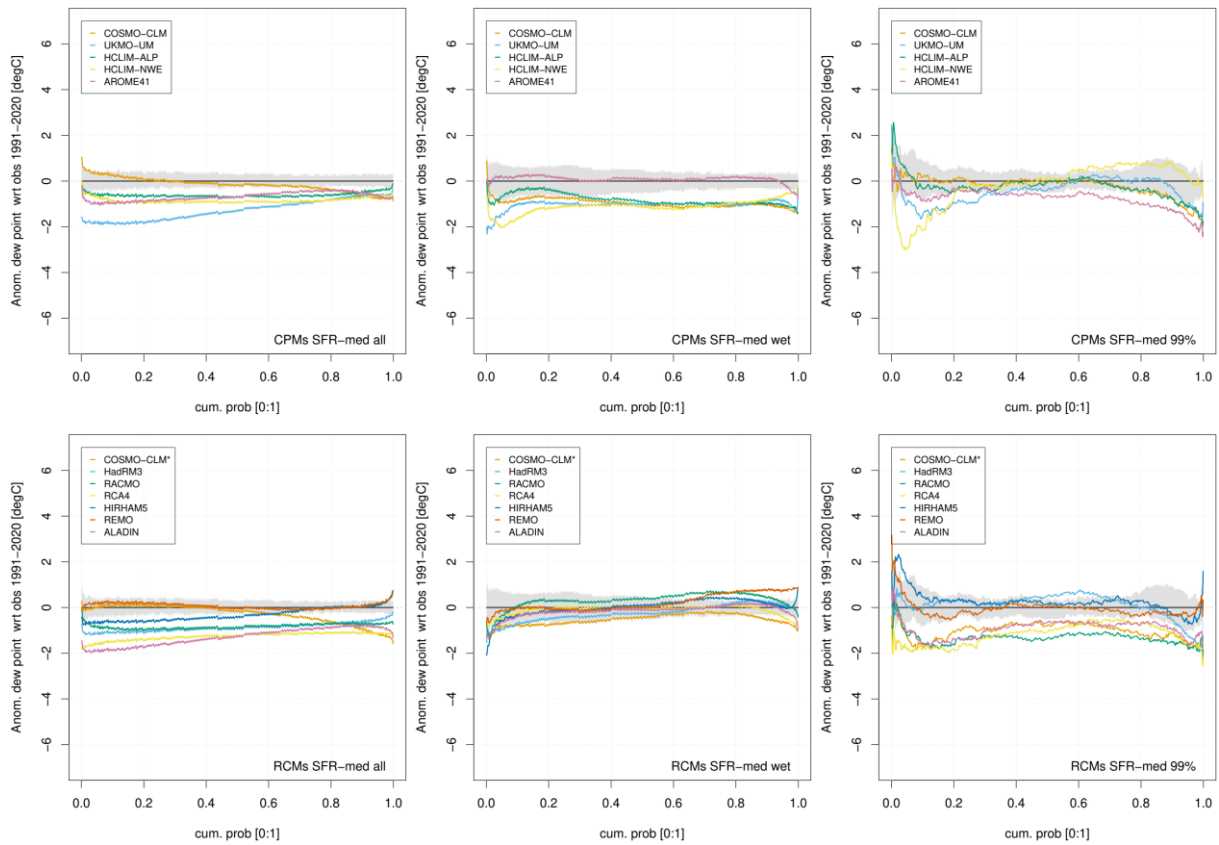

Figure S2 (two pages). Dew point anomaly of the CPMs and RCMs compared to observations, for all hours (left) and wet hours (middle) and hours with rain exceeding the 99<sup>th</sup> percentile (right). Each panels shows the anomaly in the distribution from low dew points (left) to high dew points (right). Results are shown for NL (first two rows on previous page), SFR-cent (last two rows on previous page and SFR-med (this page)). Comparing panels from left to right one can easily see how the anomaly depends on the rainfall intensity class. Note also that some models, for example, HIRHAM5 shows wider distribution of the dew point than the observations, in particular overestimating high dew point values (positive biases of 2-4 degree in left plots for NL and SFR-cent).

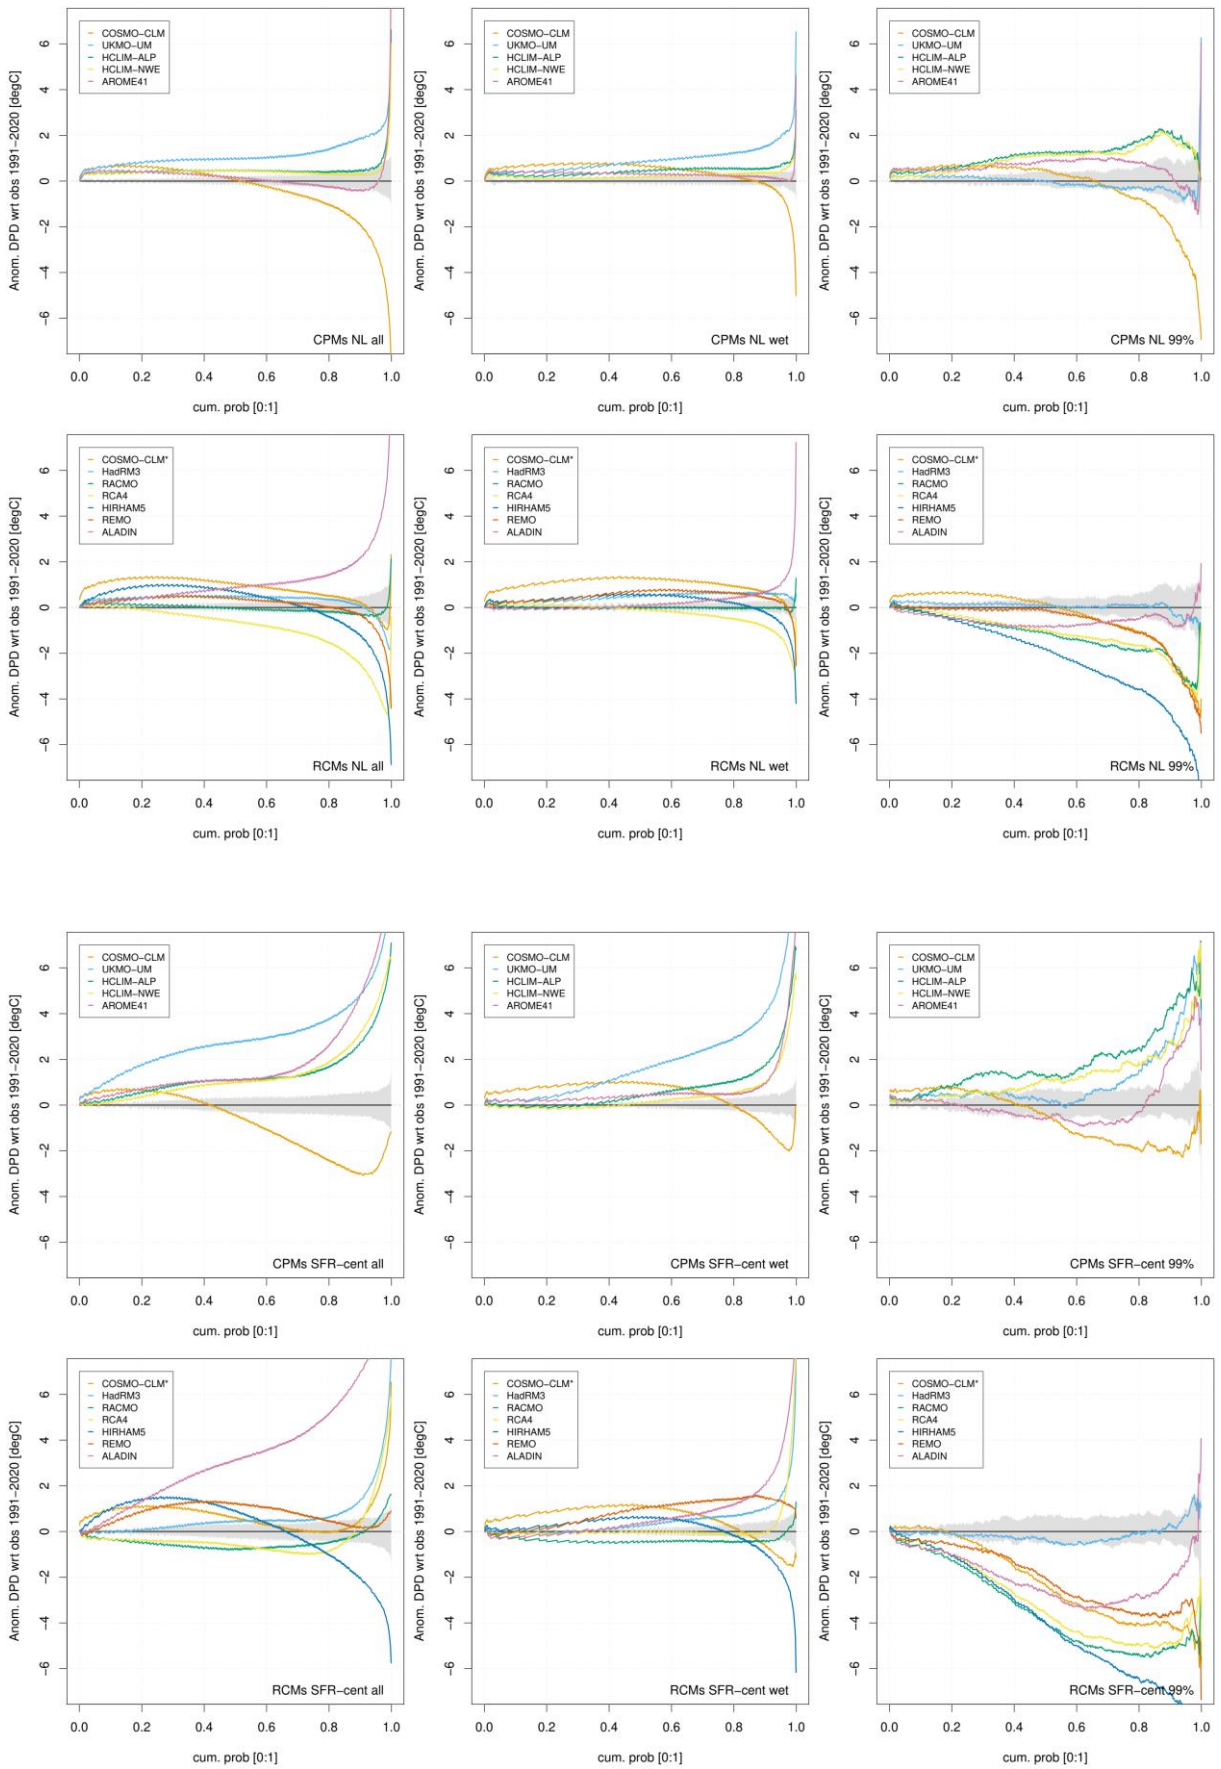

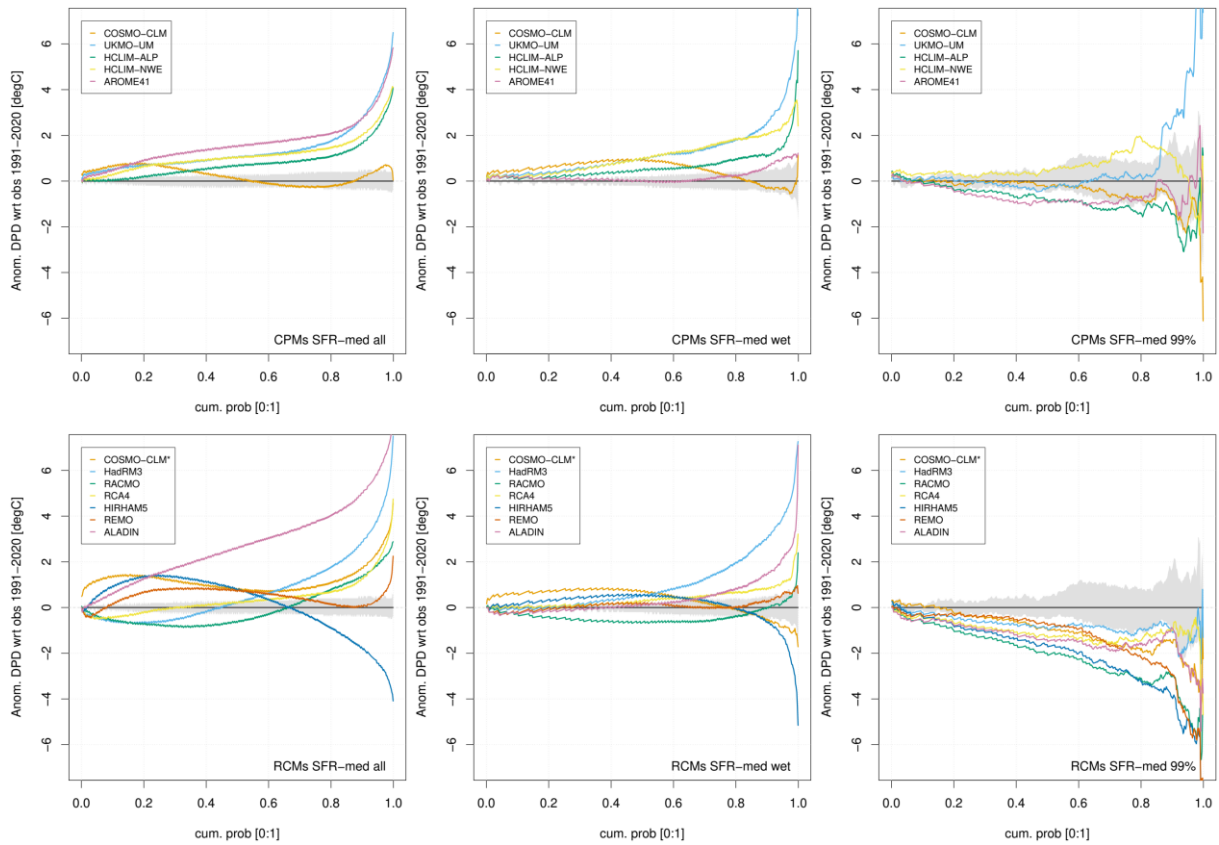

Figure S3. Same as previous plot, but now for anomaly in dew point depression. For all areas, the RCMs show a very substantial shift to low DPD (that is, high relative humidity) for the most extreme rainfall – a shift not visible in the CPM results.



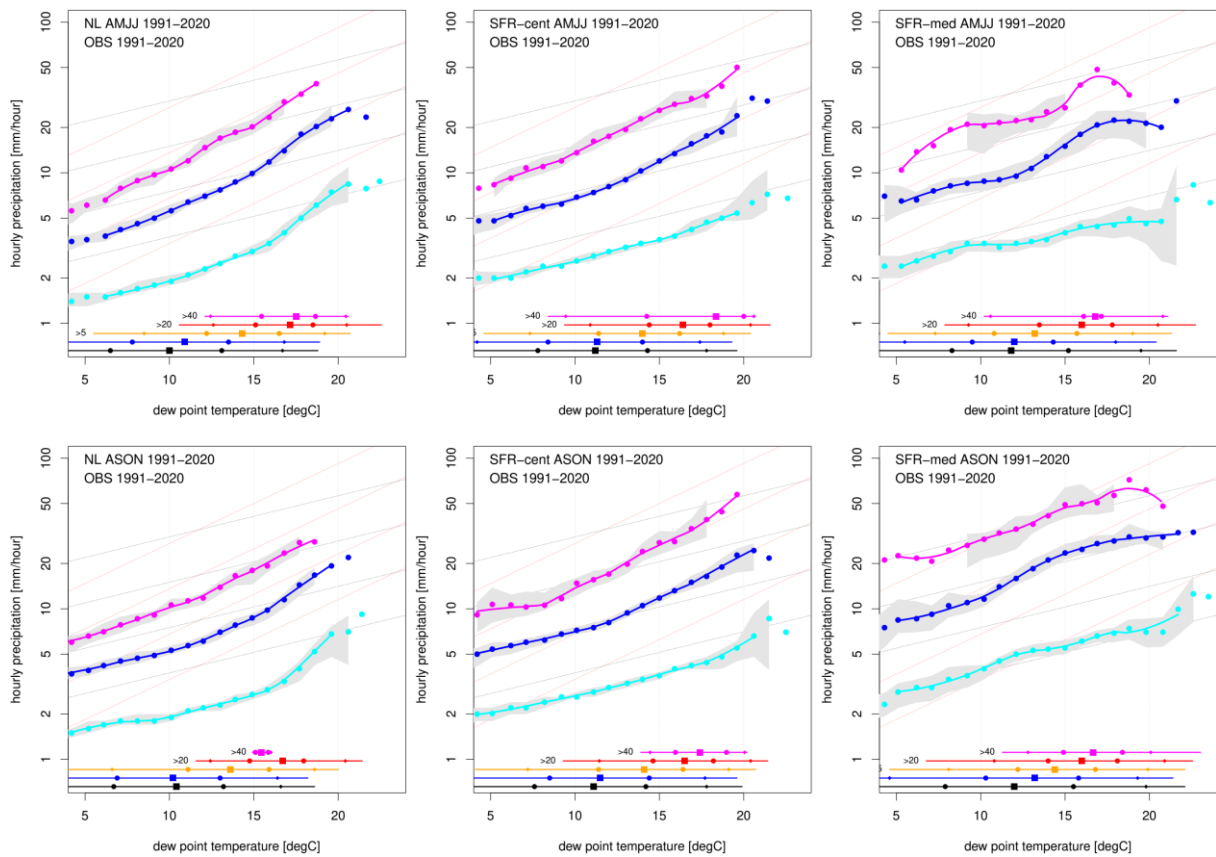

Figure S4. As Figure 5 of main text, but now for AMJJ (upper panels) and ASON (lower panels)

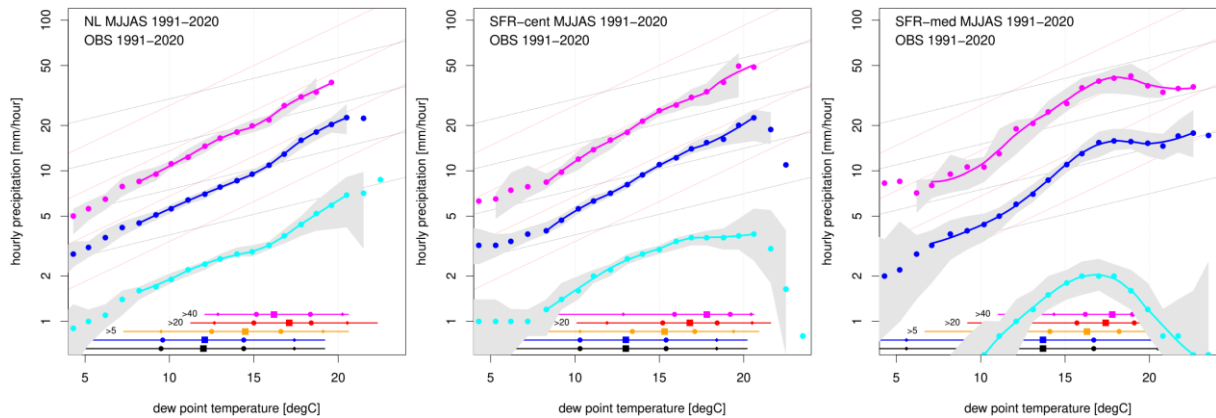

Figure S5. As Figure 5 of main text, but now absolute percentiles, 99<sup>th</sup> (cyan), 99.9<sup>th</sup> (blue) and 99.99<sup>th</sup> (magenta). Note, rather similar behavior, yet larger uncertainty estimates in particular for the lower percentiles. This could be related to strong influence of large-scale circulation on the frequency of rainfall, which is sampled with the bootstrap. Note also that the blue horizontal line at the bottom gives the distribution of all days (and not exceeding 0.1 mm as in the main text) and is therefore the same as the black line below.

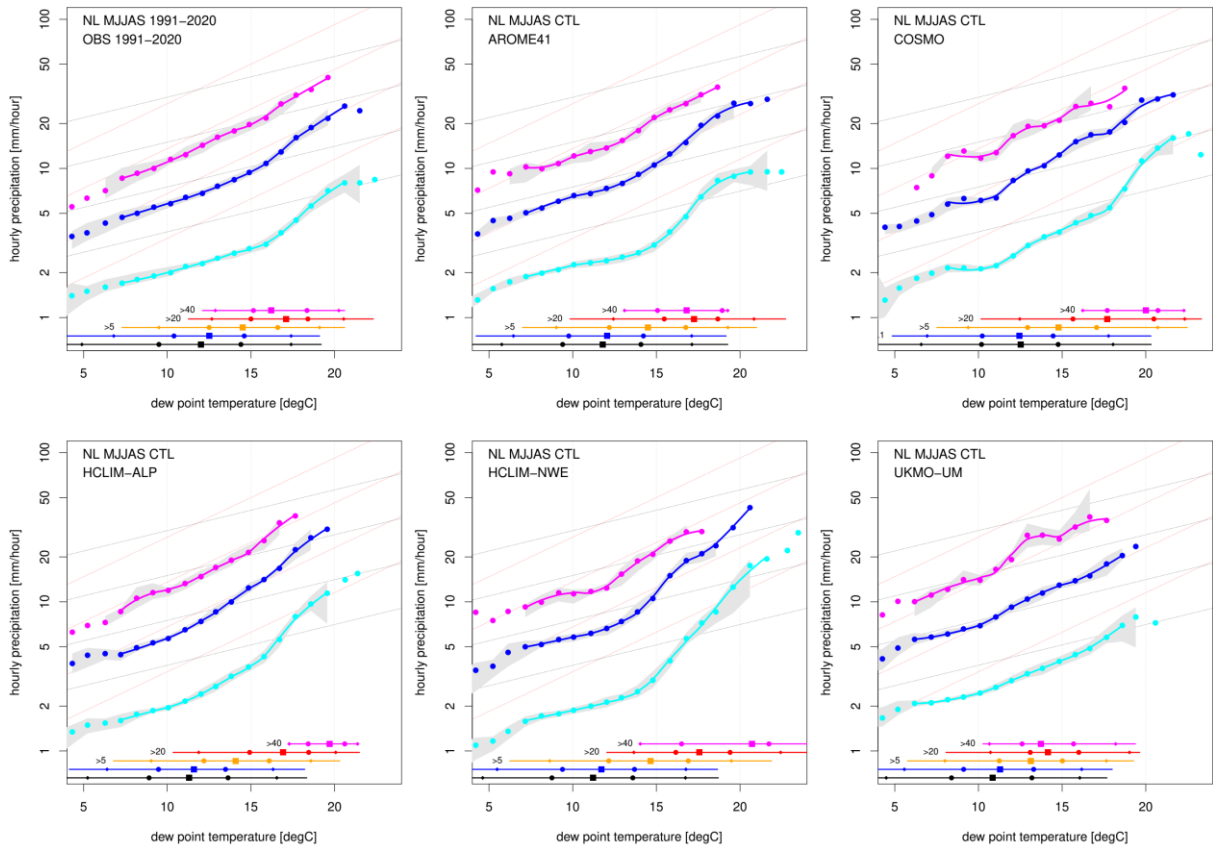

Figure S6. Scaling of hourly extremes on dew point temperature, CPM results compared to observations (left-top) for NL. Lines and symbols similar to Figure 6 of the main document.

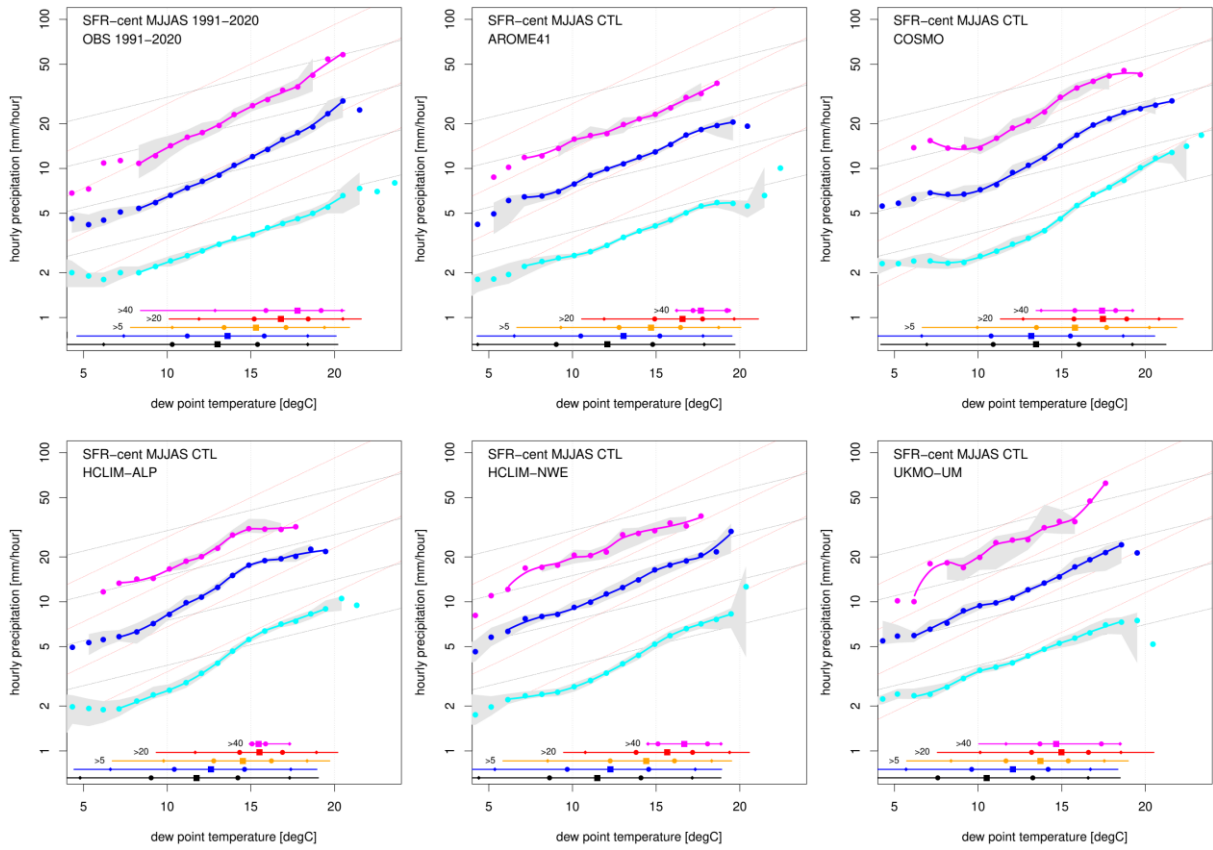

Figure S7. Scaling of hourly extremes on dew point temperature, CPM results compared to observations (left-top) for SFR-cent

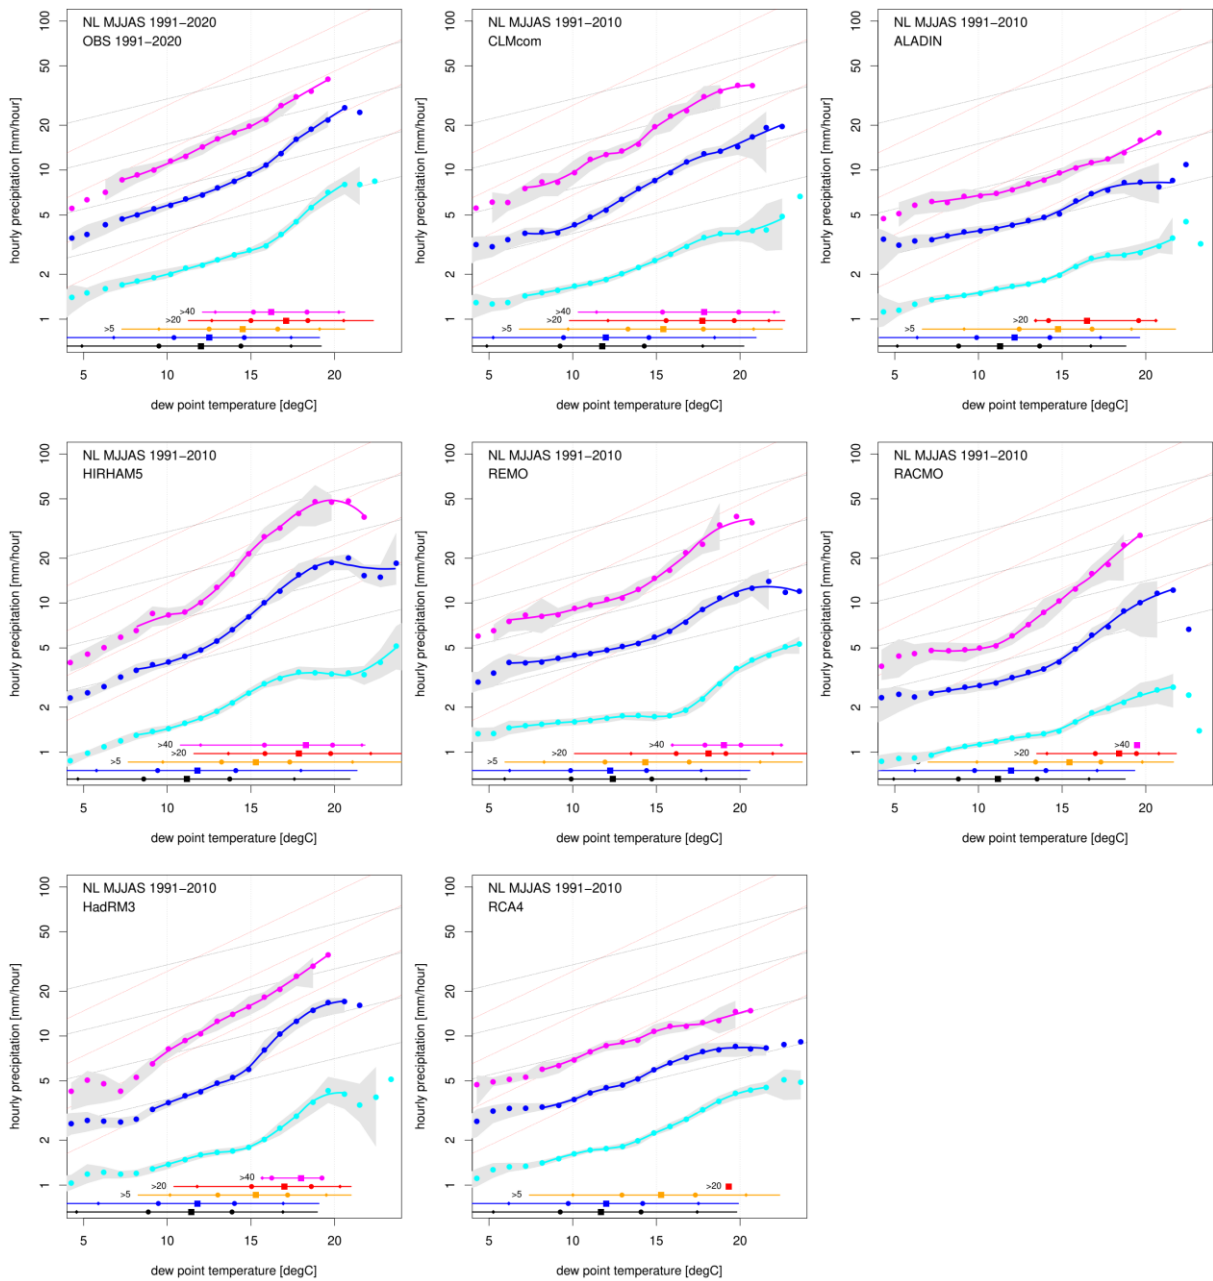

Figure S8. Scaling of hourly extremes on dew point temperature, RCM results compared to observations (left-top) for NL. We note that the scale break, switching from (sub)CC rates to rates beyond 2CC, in RACMO around 12 °C dewpoint is caused by the development of resolved convective systems – with an up and a downdraft – that are too persistent and long lived.

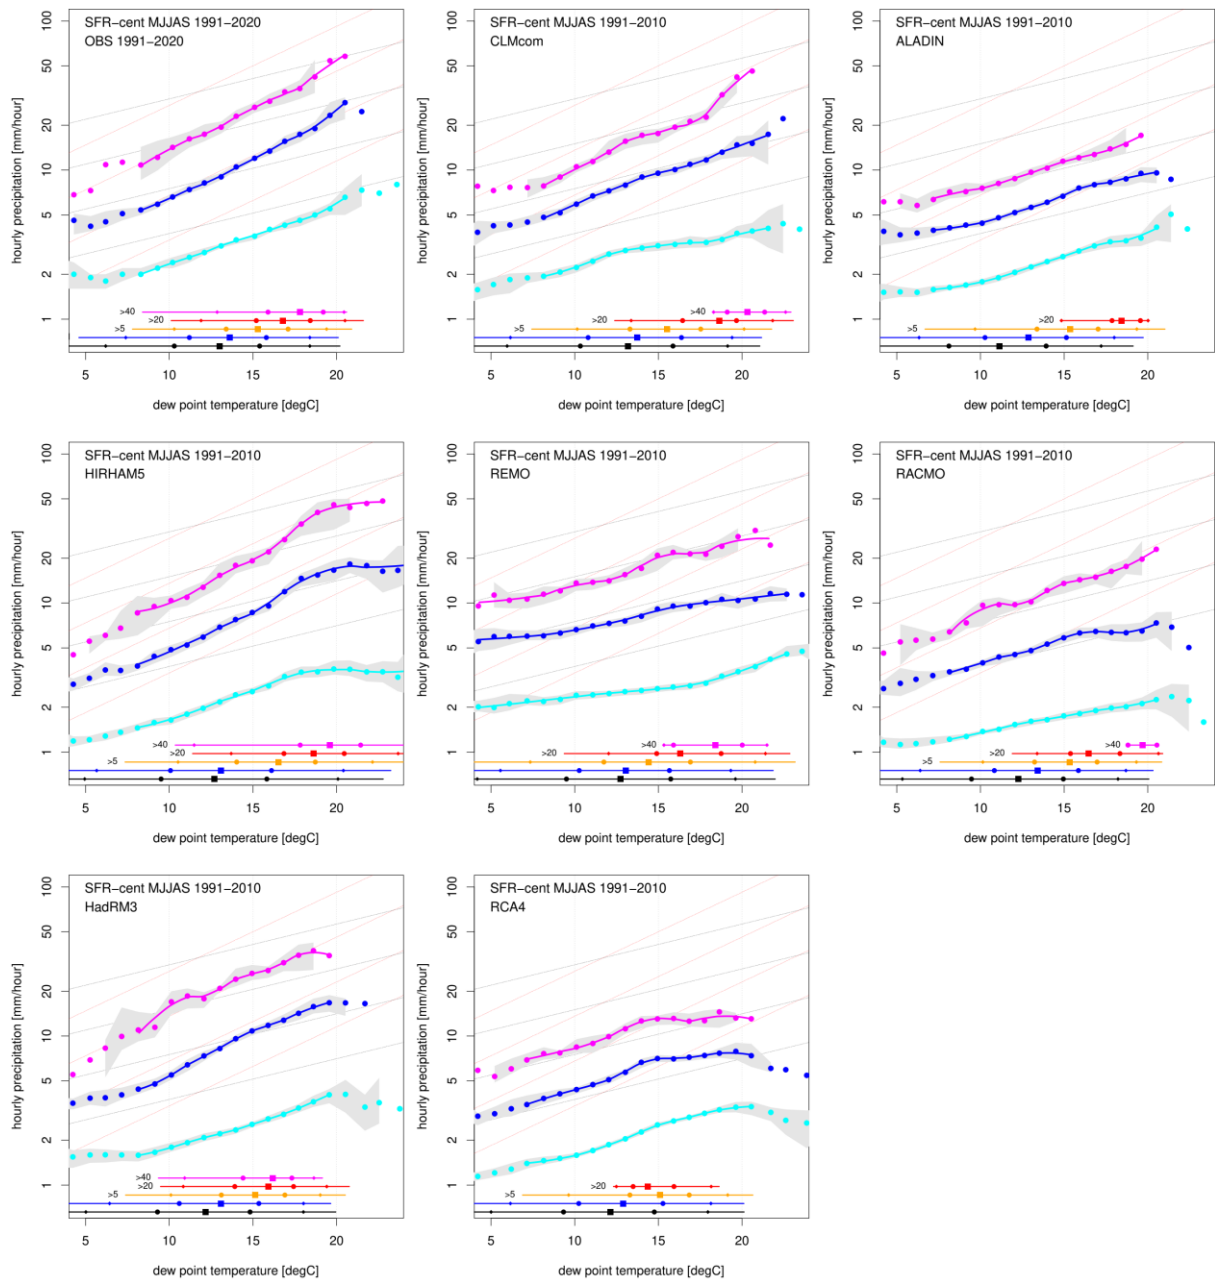

Figure S9. Scaling of hourly extremes on dew point temperature, RCM results compared to observations (left-top) for SFR-cent

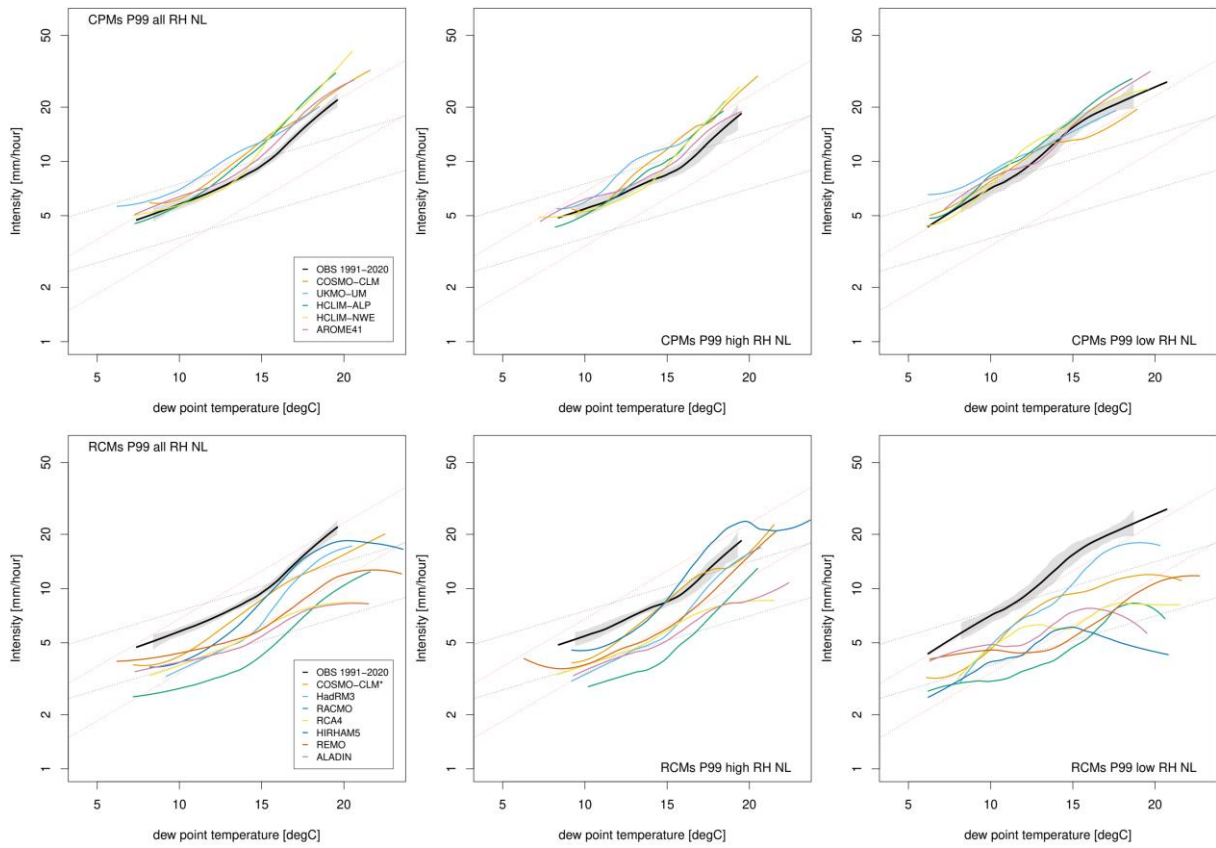

Figure S10. As Figure 6 of the main text, but now for NL.

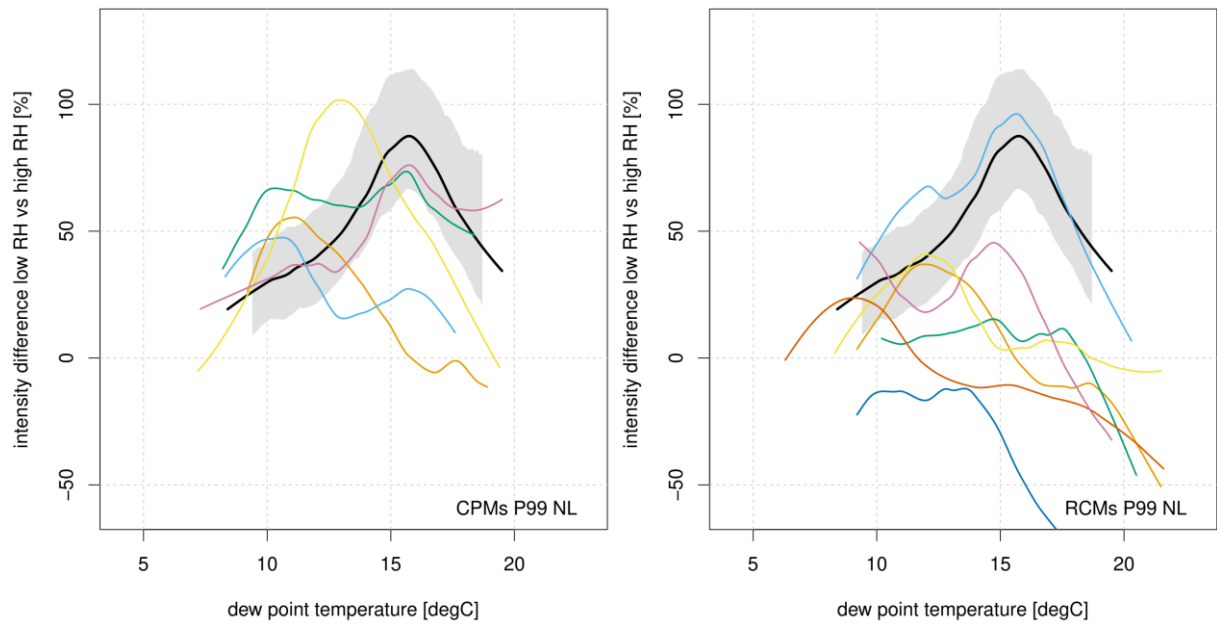

Figure S11. As Figure 8 of main text, but now for NL.

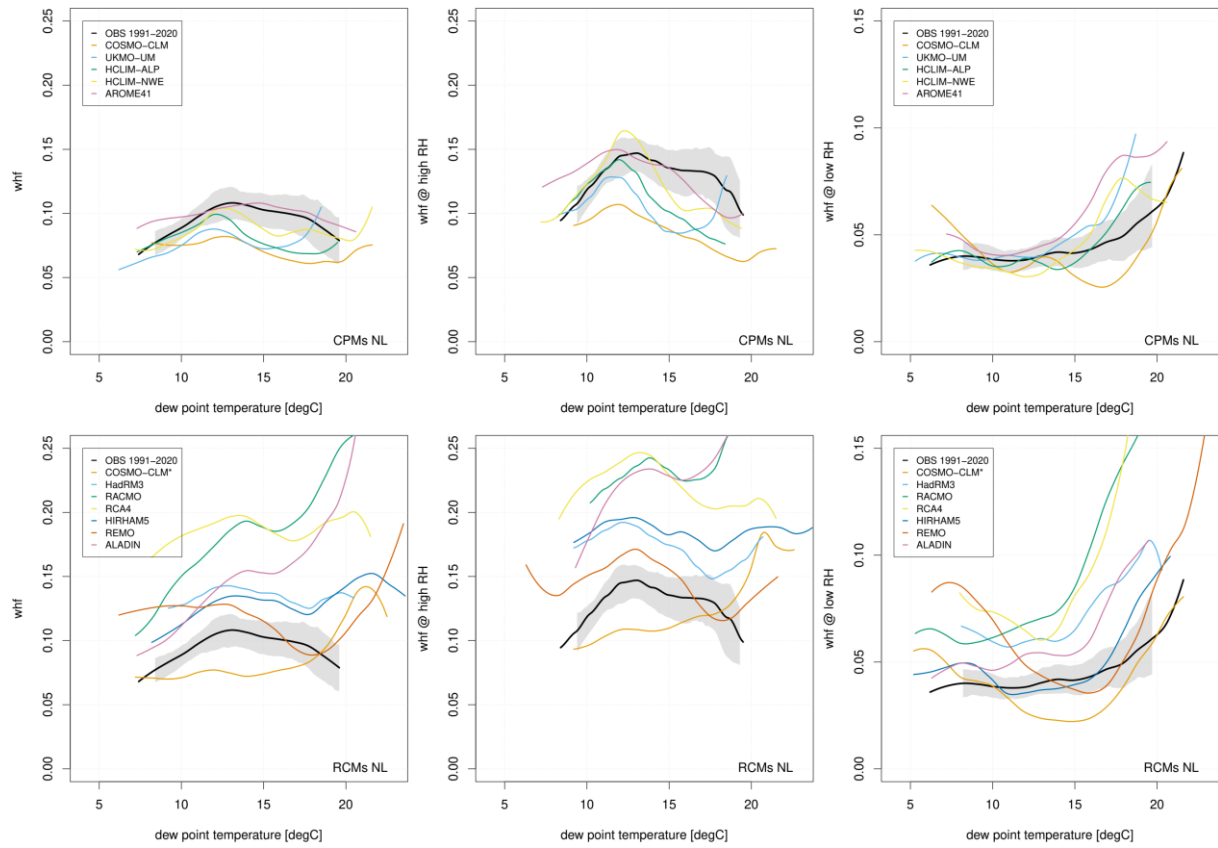

Figure S12. As Figure 9 from main text, but now for NL.



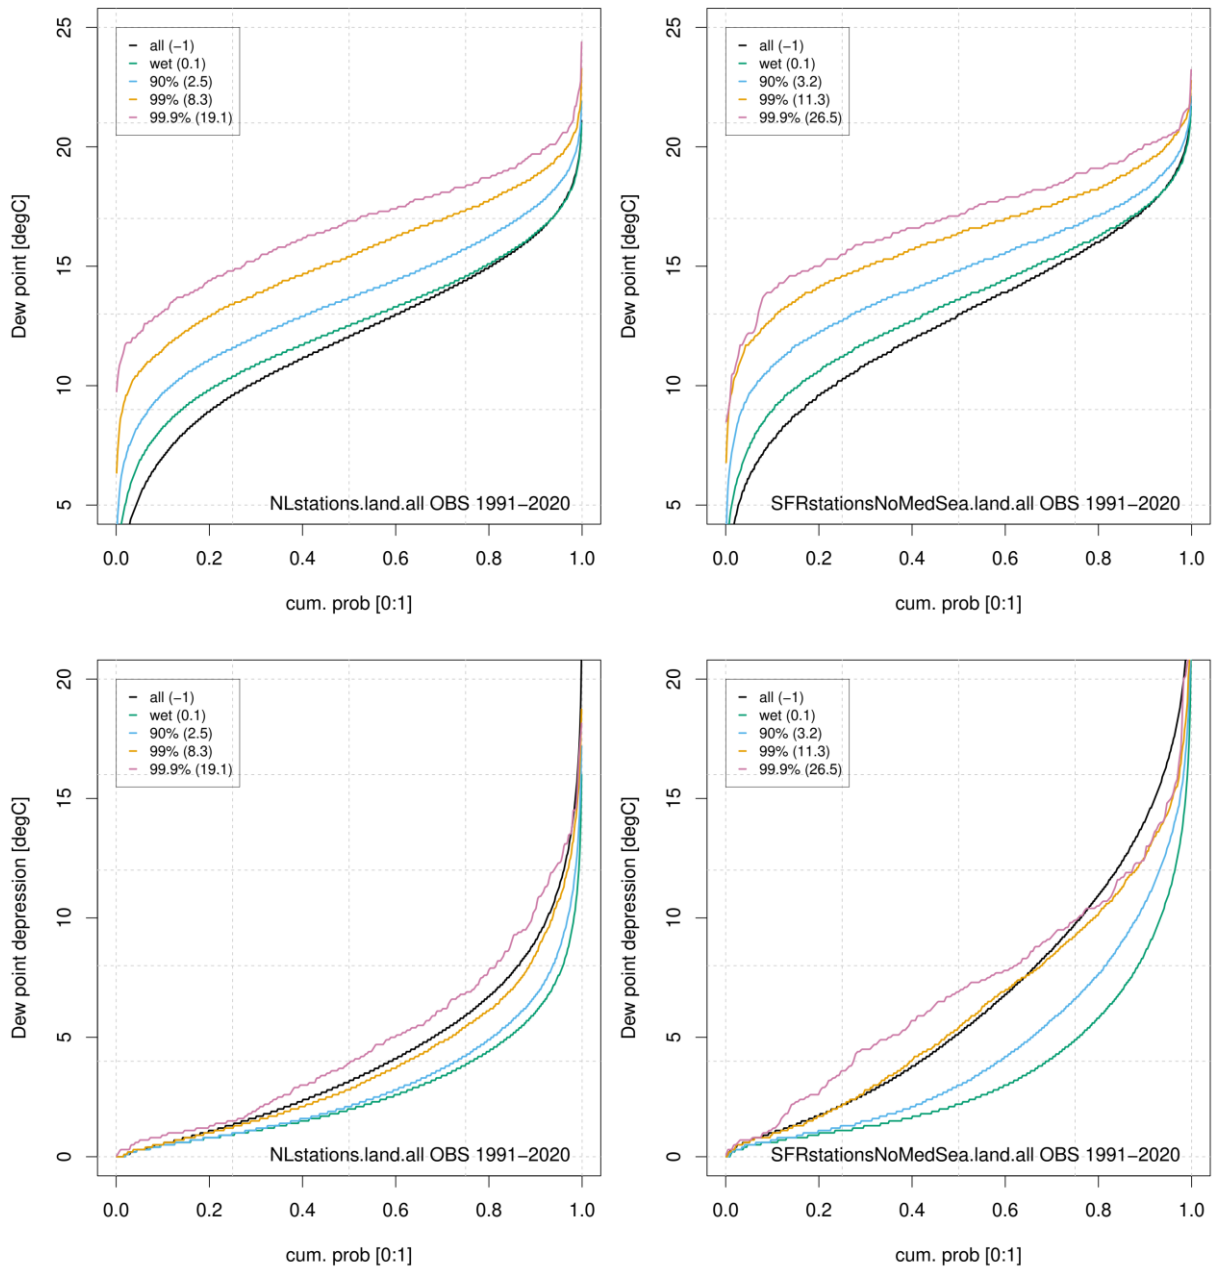

Figure S13. Distribution of dew point and dew point DP (upper panels) and dew point depression DPD for different selections of data based rainfall intensity, classified into all hours, wet hours, and hours with rain exceeding the 90, 99, 99.9<sup>th</sup> percentile of rain (wet conditioned); the rainfall threshold are mentioned in the legend. Left are results for NL, and right for SFR-cent. More extreme rainfall occurs at higher DP (higher absolute humidity) and higher DPD (lower relative humidity).

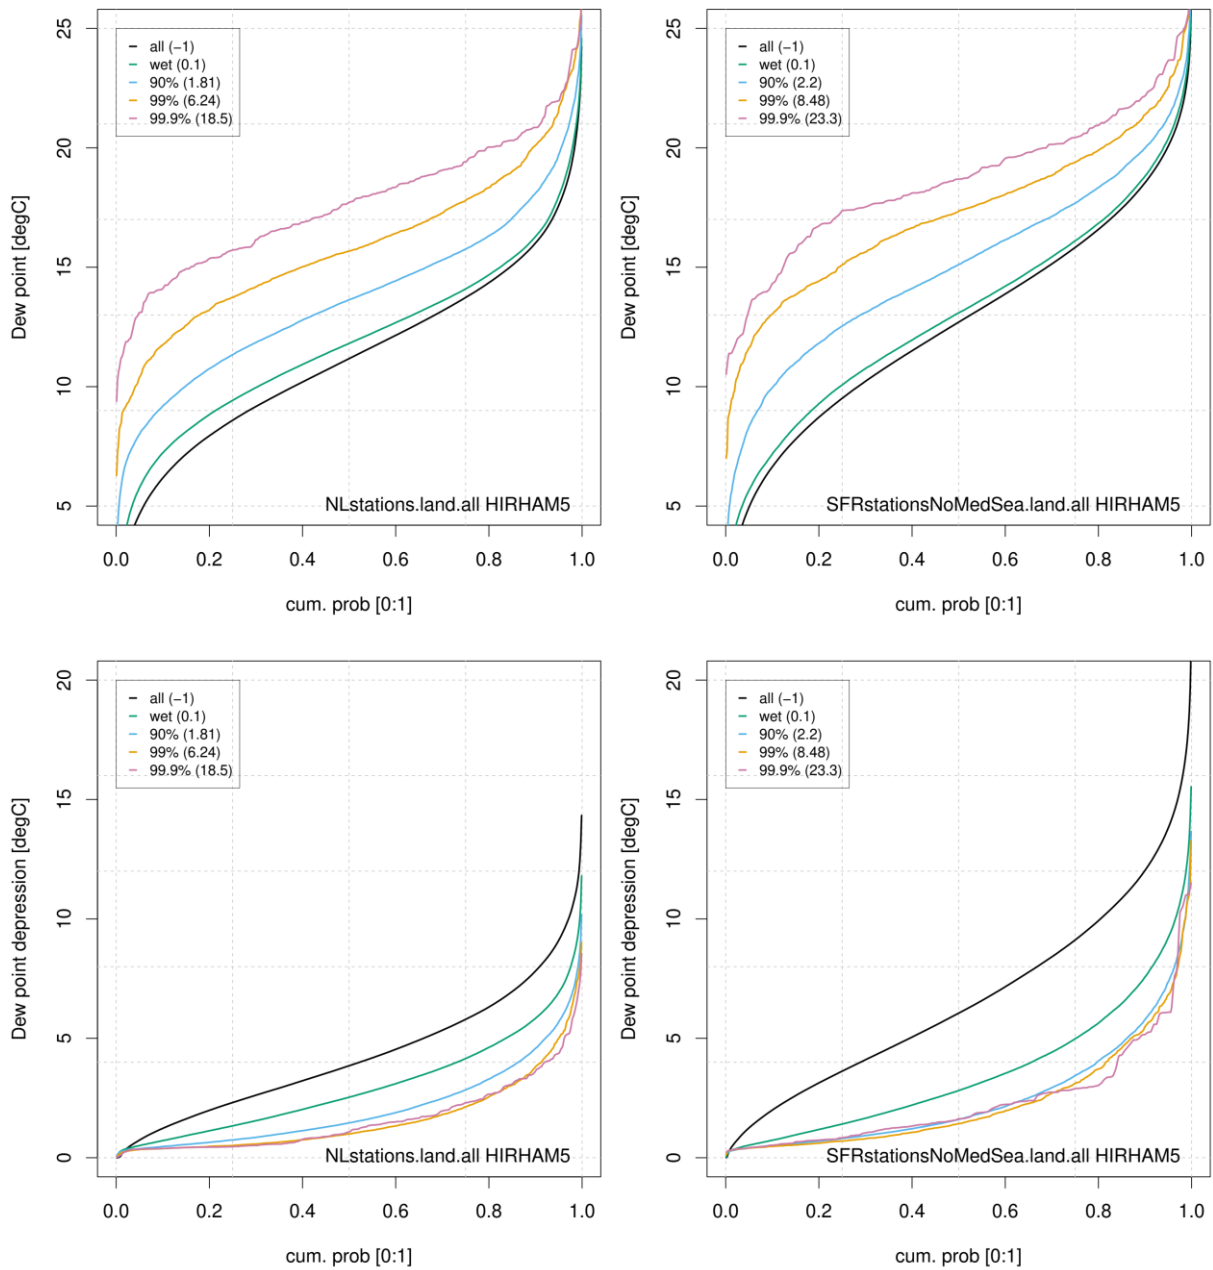

Figure S14. Same as previous Figure, but now for an RCM (HIRHAM5). The model slightly overestimates absolute humidity for extreme events, but strongly overestimates the relative humidity (too small DPD).

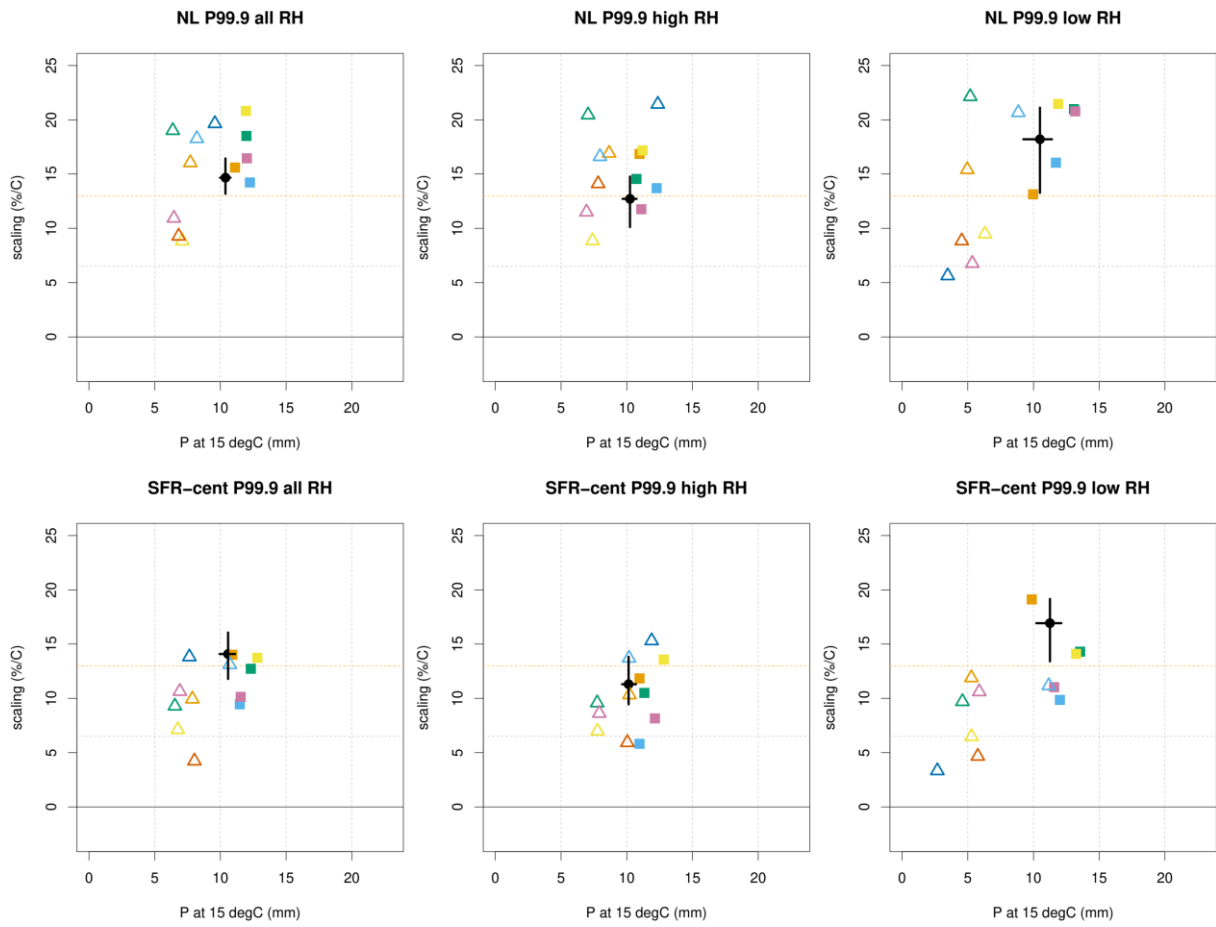

Figure S15. As Figure 7 of the main text, but now for the 99.9<sup>th</sup> percentile of all hours (absolute percentile). Note the slightly higher values of precipitation for low relative humidity (11-12 mm, on the right) as compared to high relative humidity (10 mm, middle). Note also that observed scaling coefficients have larger uncertainty estimates and vary more for the different selections on relative humidity, but are again surprisingly similar in NL and SFR-cent.

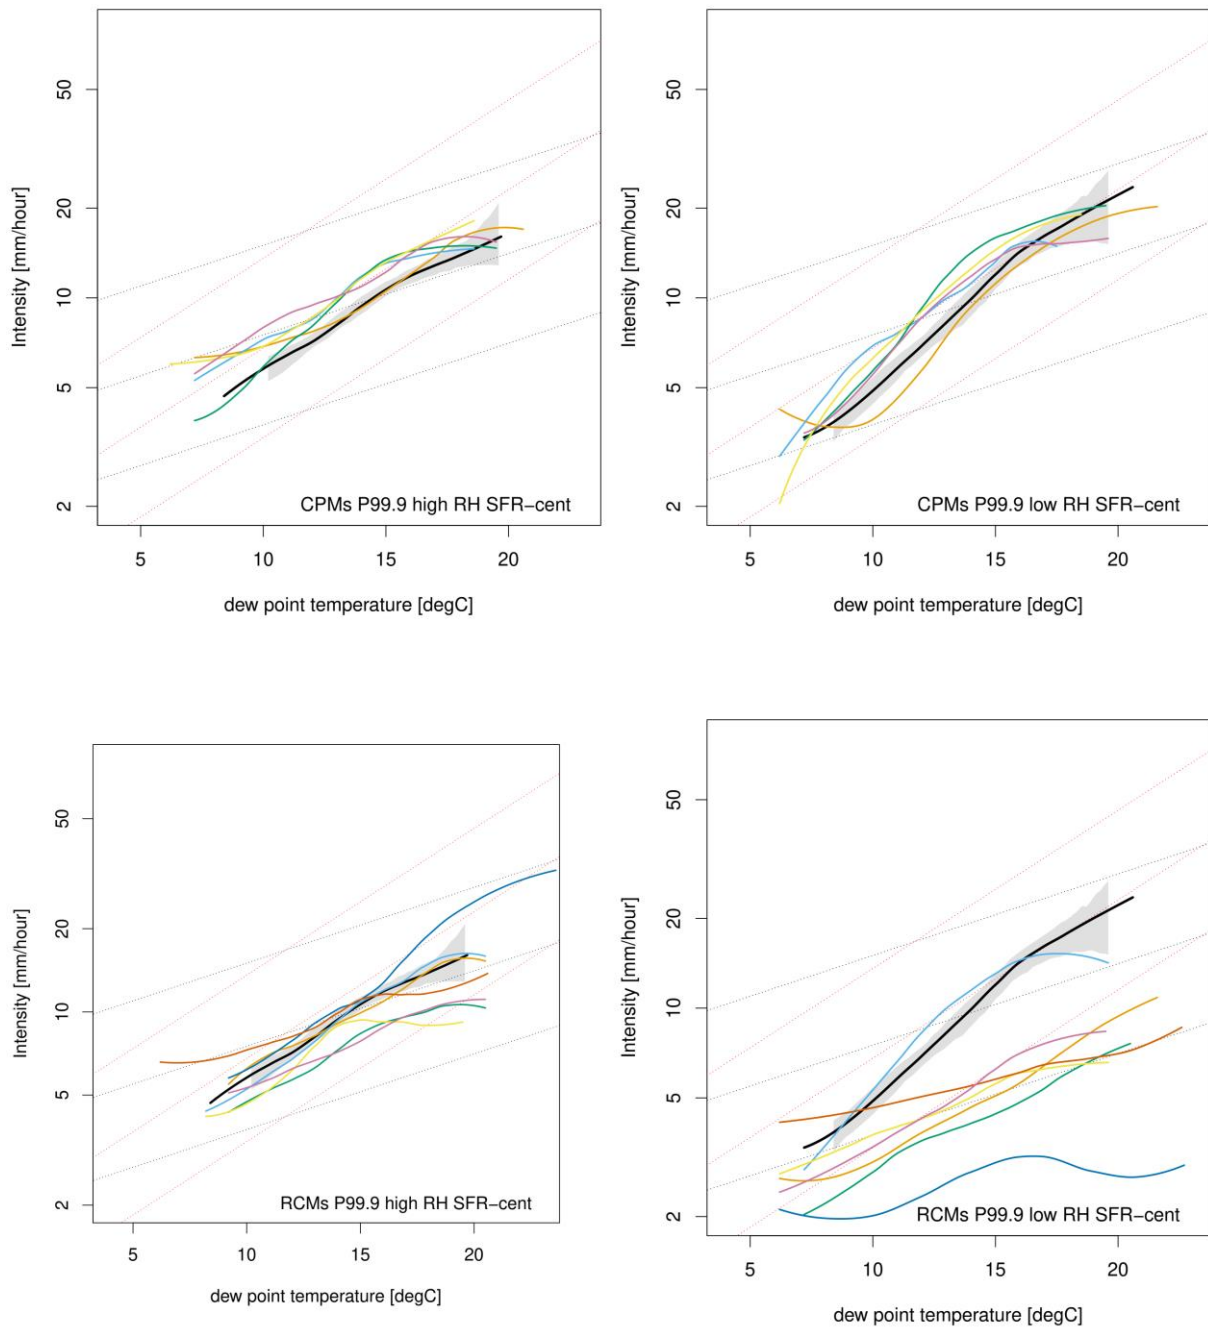

Figure S16. Scaling of hourly rainfall for cases with high relative humidity (left) and low relative humidity (right). Percentiles are now based on all hours, including dry hours. Shown is the 99.9<sup>th</sup> percentile (~ once every 1000 hours). Upper panels compare CPMs to the observations, and lower panels the RCMs.

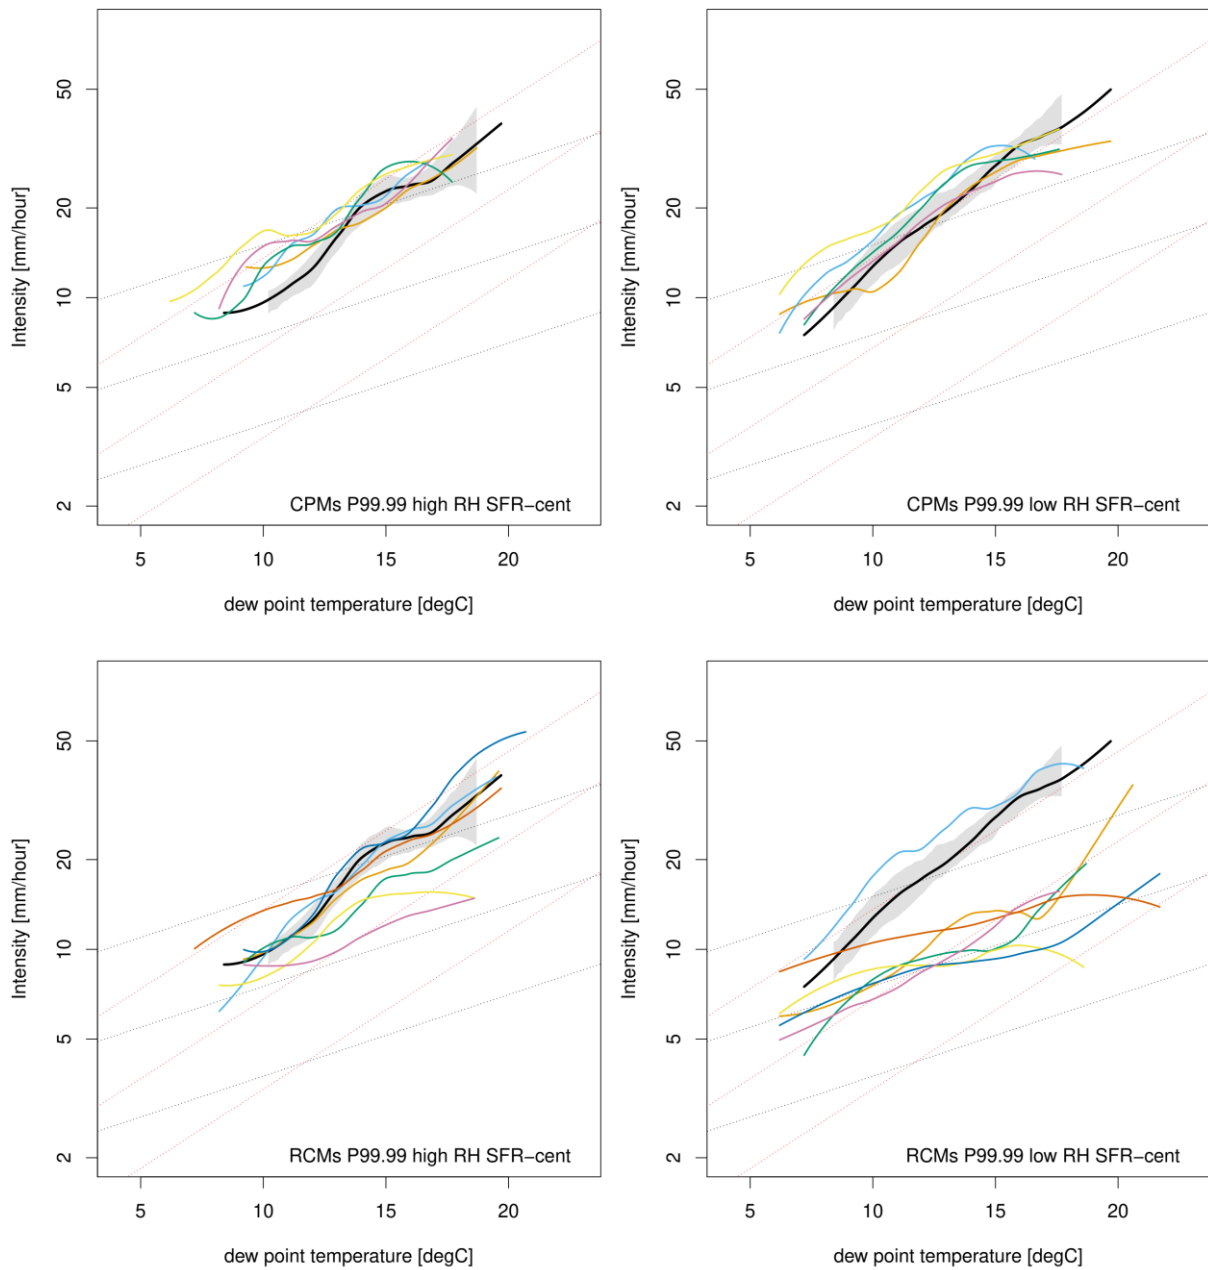

Figure S17. Same as previous Figure, but now the 99.99<sup>th</sup> percentile of hourly rainfall.

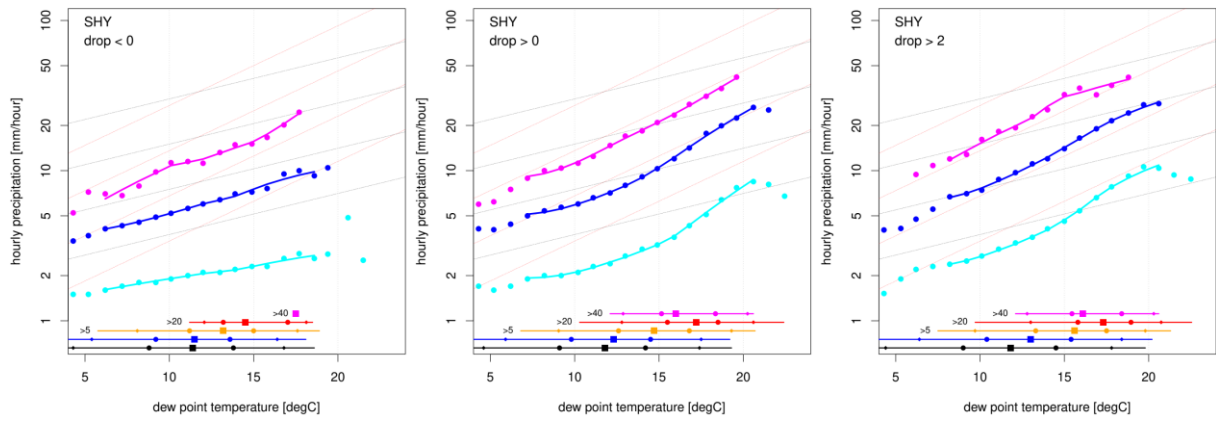

Figure S18. Scaling on sub-selections of data characterized by the temperature drop between two hour before and one hour after the rainfall measurement. From left to right, a temperature rise (negative drop), temperature drop, and temperature drop exceeding 2 degrees.

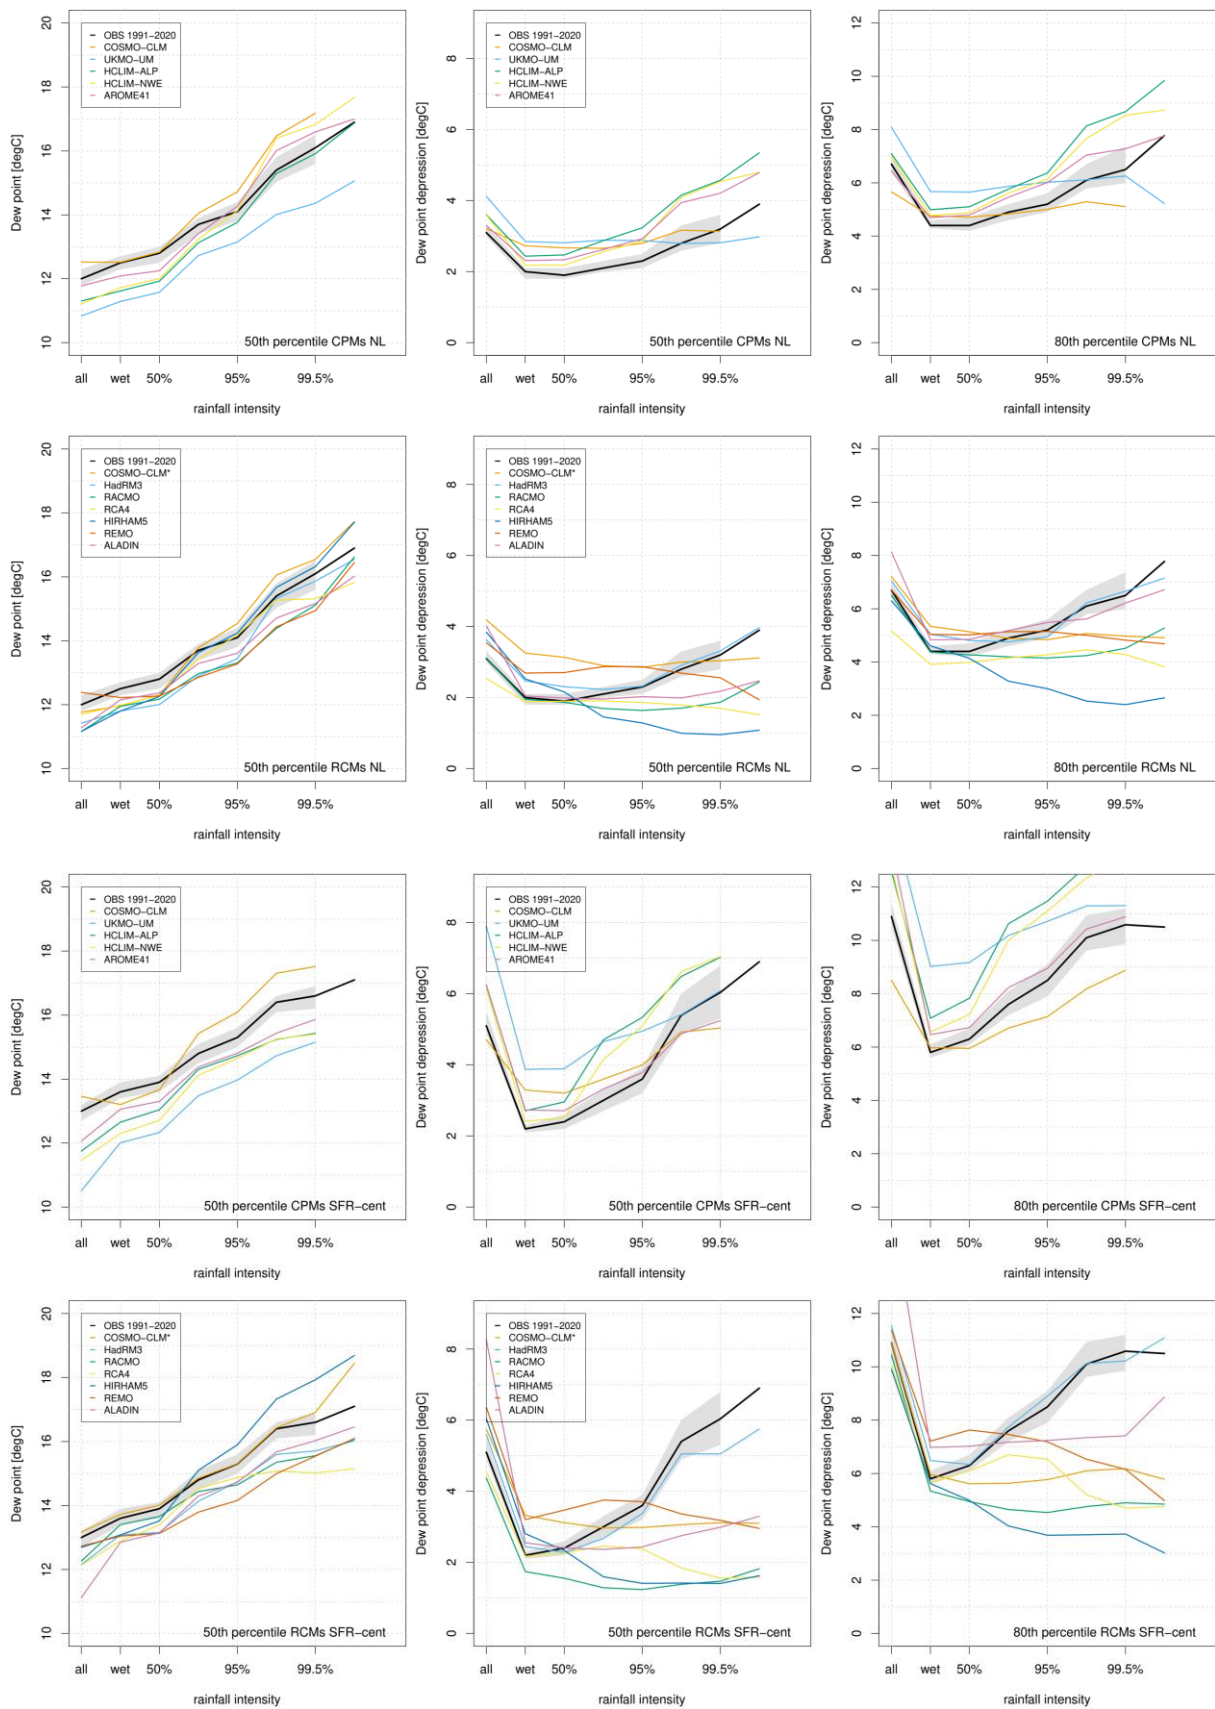

Figure S19. As Figure 3 of paper, but now with the CPM results based on mean precipitation over 5x5 grid points similar to the resolution of the RCMs.

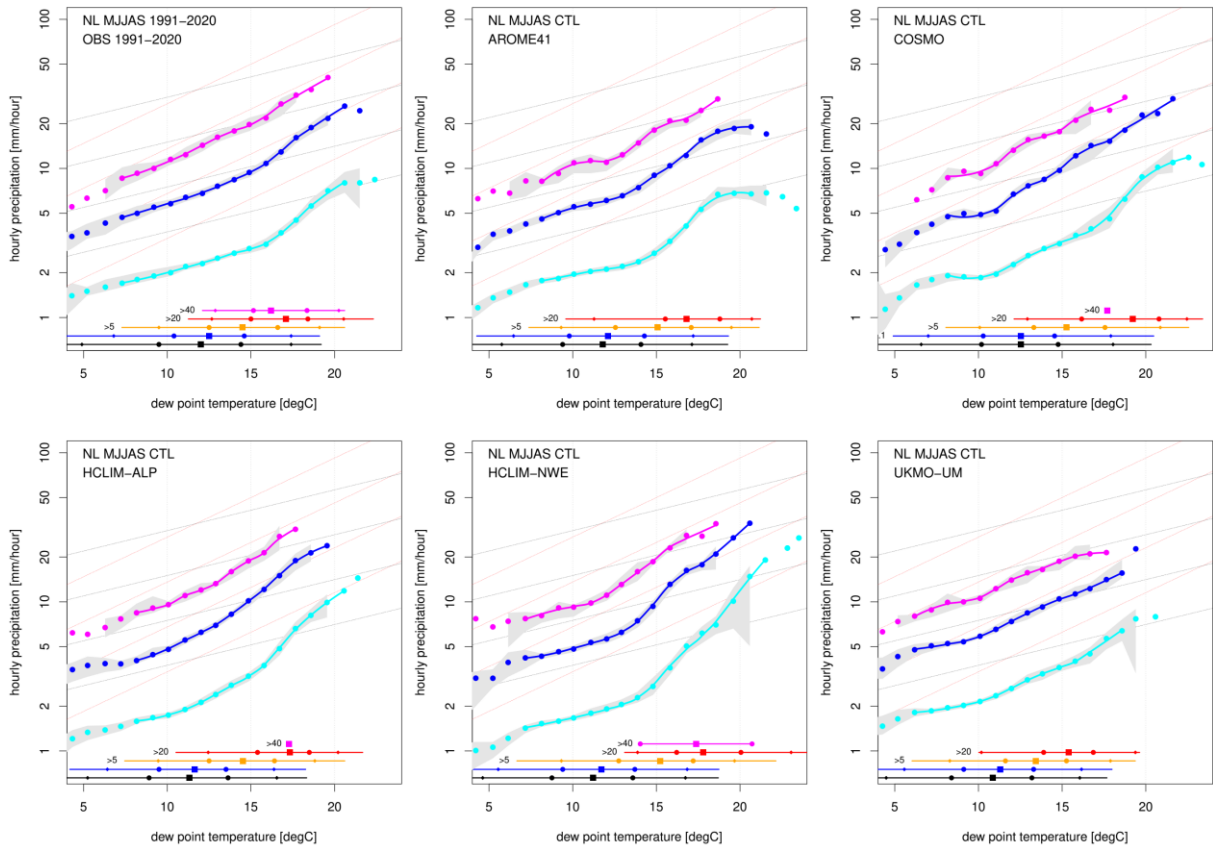

Figure S20. As Figure S6 of supplement, but now with the CPM results based on mean precipitation over 5x5 grid points similar to the resolution of the RCMs.
